1

2 **Characterization of the SARS-CoV-2 Spike in an Early Prefusion Conformation**

3

4 Tingting Li<sup>1,2,#</sup>, Qingbing Zheng<sup>1,2,#</sup>, Hai Yu<sup>1,2,#</sup>, Dinghui Wu<sup>3,#</sup>, Wenhui Xue<sup>1,2,#</sup>,  
5 Yuyun Zhang<sup>1,2</sup>, Xiaofen Huang<sup>1,2</sup>, Lizhi Zhou<sup>1,2</sup>, Zhigang Zhang<sup>1,2</sup>, Zhenghui Zha<sup>1,2</sup>,  
6 Tingting Chen<sup>1,2</sup>, Zhiping Wang<sup>1,2</sup>, Jie Chen<sup>1,2</sup>, Hui Sun<sup>1,2</sup>, Tingting Deng<sup>1,2</sup>, Yingbin  
7 Wang<sup>1,2</sup>, Yixin Chen<sup>1,2</sup>, Qinjian Zhao<sup>1,2</sup>, Jun Zhang<sup>1,2</sup>, Ying Gu<sup>1,2,\*</sup>, Shaowei Li<sup>1,2,\*</sup>,  
8 Ningshao Xia<sup>1,2,\*</sup>

9

10 <sup>1</sup> State Key Laboratory of Molecular Vaccinology and Molecular Diagnostics, School  
11 of Life Sciences, School of Public Health, Xiamen University, Xiamen, China 361102

12 <sup>2</sup> National Institute of Diagnostics and Vaccine Development in Infectious Disease,  
13 Xiamen University, Xiamen, China 361102

14 <sup>3</sup> Department of Pulmonary Medicine, The First Affiliated Hospital of Xiamen  
15 University, Xiamen, China 361003

16

17

18 # T.L., Q.Z., D.W., H.Y. and W.X. contributed equally to this work.

19 \* To whom correspondence may be addressed. E-mail: (Y.G.) [guying@xmu.edu.cn](mailto:guying@xmu.edu.cn) or  
20 (S.L.) [shaowei@xmu.edu.cn](mailto:shaowei@xmu.edu.cn) or (N.X.) [nsxia@xmu.edu.cn](mailto:nsxia@xmu.edu.cn)

21

22 **Running title:** SARS-CoV-2 spike in an early prefusion conformation

23 **Abstract**

24 Pandemic coronavirus disease 2019 (COVID-19) is caused by the emerging severe  
25 acute respiratory syndrome coronavirus 2 (SARS-CoV-2), for which there are no  
26 efficacious vaccines or therapeutics that are urgently needed. We expressed three  
27 versions of spike (S) proteins—receptor binding domain (RBD), S1 subunit and S  
28 ectodomain—in insect cells. RBD appears monomer in solutions, whereas S1 and S  
29 associate into homotrimer with substantial glycosylation. The three proteins confer  
30 excellent antigenicity with six convalescent COVID-19 patient sera. Cryo-electron  
31 microscopy (cryo-EM) analyses indicate that the SARS-CoV-2 S trimer dominate in a  
32 unique conformation distinguished from the classic prefusion conformation of  
33 coronaviruses by the upper S1 region at lower position  $\sim 15$  Å proximal to viral  
34 membrane. Such conformation is proposed as an early prefusion state for the SARS-  
35 CoV-2 spike that may broaden the knowledge of coronavirus and facilitate vaccine  
36 development.

37 **Key words:** COVID-19, SARS-CoV-2, spike, cryo-electron microscopy, antigenicity,  
38 early prefusion conformation

39

## 40 **Introduction**

41 The novel coronavirus grouped in betacoronavirus genus has become the third serious  
42 virus intruder to human in the coronaviridae, after severe acute respiratory syndrome  
43 coronaviruses (SARS-CoV) and middle east respiratory syndrome coronavirus  
44 (MERS-CoV), recently named SARS-CoV-2. In the phylogenetic tree of the  
45 coronaviruses, SARS-CoV-2 is genetically close to some bat coronavirus and SARS-  
46 CoV, however, with its origin undefined<sup>1</sup>. SARS-CoV-2 causative disease  
47 "Coronavirus disease 2019" (abbreviated "COVID-19") is characterized by high fever,  
48 dry cough, difficulty breathing and severe atypical pneumonia, which usually be  
49 confirmed by virus RNA positive or pulmonary computed tomography (CT) in clinical  
50 practice<sup>2, 3</sup>. In terms of higher human-to-human transmissibility, SARS-CoV-2 has  
51 spread over 118 countries and areas, and led to over 125,288 confirmed cases  
52 worldwide and at least 4,614 deaths, as of March 12<sup>th</sup> 2020. The World Health  
53 Organization (WHO) has declared the SARS-CoV-2 epidemic as a pandemic of  
54 international concern and updates the COVID-19 situation every day.

55 SARS-CoV-2 is an enveloped, single and positive-stranded RNA virus  
56 encapsulated with a genome of ~30 kb. At least three membrane proteins including the  
57 surface spike protein (S), an integral membrane protein (M), a membrane protein (E).  
58 Like other coronaviruses, S is responsible for initiating the engagement to a specific  
59 cellular receptor angiotensin-converting enzyme 2 (ACE2) and mediating the cell-virus  
60 membrane fusion by the class I fusion mechanism<sup>4, 5</sup>. Thus, S is the main target for  
61 neutralizing antibodies against viral infection and the core immunogen constituent of

62 vaccine design. S is consisted of S1 and S2 subunits and the cleavage on S1/S2  
63 boundary by protease during biosynthesis is prerequisite for coronaviruses cellular  
64 membrane fusion and subsequent infection<sup>6</sup>. SARS-CoV-2 evolves a 4-residue  
65 insertion (RRAR) as potential furin cleavage site rather than SARS-CoV and other bat  
66 coronaviruses, which may contribute to the higher transmissibility of this novel  
67 coronavirus<sup>6,7</sup>. Previous studies suggested the infection process of MERS-CoV<sup>8</sup> and  
68 SARS<sup>9</sup> viruses, where S trimer undergoes conformational transition from a prefusion  
69 conformation ready for ACE2 binding to a postfusion conformation for eventual virus-  
70 cell membrane fusion. Structure determination of SARS-CoV and MERS-CoV spike  
71 trimers captured a variety of scenarios in the prefusion conformation showing partial  
72 (one or two) receptor-binding domain (RBD) in the “up” conformation and the rest in  
73 the “down”, and all in either “up” or “down”. The conformation transition from “down”  
74 to “up” could expose the receptor binding site, and the subsequent receptor engagement  
75 would lead to a substantial conformation rearrangement of S trimer from prefusion  
76 conformation to postfusion. Two recent studies<sup>7,10</sup> reported cryo-electron microscope  
77 (cryo-EM) structures of SARS-CoV-2 spike trimers in the prefusion conformation with  
78 2 RBDs down and 1 RBD up. In the case of SARS-CoV, this conformational change  
79 during RBDs “down” to “up” was associated with the binding of receptor ACE2 as well  
80 as the recognition of neutralizing monoclonal antibodies<sup>11</sup>.

81 A safe and efficacious vaccine is urgently needed to control and eliminate the  
82 SARS-CoV-2 infection. Various forms of vaccine candidates, mostly aiming to elicit  
83 neutralizing antibodies against S proteins, are under preclinical research or even

84 subjected to clinical trials<sup>12</sup>. Here, we cloned S ectodomain and its fragments RBD and  
85 S1 into recombinant baculovirus and expressed the proteins in insect cells. We found  
86 that S and S1 formed homotrimer in solutions and the three proteins reacted well with  
87 COVID-19 convalescent human sera. Cryo-EM analysis demonstrated the S trimer  
88 unexpectedly retains a unique conformation distinguished from the classic prefusion  
89 conformation of coronavirus spikes, that may represent an early state rather than the  
90 known prefusion conformation of S spike. These results might broaden the knowledge  
91 on coronavirus virology and provide another protective conformation of S trimer for  
92 structure-based vaccine design against SARS-CoV-2 infection and its causative  
93 COVID-19.

94

## 95 **Results**

### 96 **Construct design, expression and purification of SARS-CoV-2 S proteins**

97 To screen a potent immunogen for COVID-19 vaccine development, we designed three  
98 constructs—S ectodomain, S1 and RBD—for the SARS-CoV-2 Spike (S) protein  
99 expression by aligning the SARS-CoV-2 S gene (Genbank accession no. NC\_045512.2)  
100 to a SARS-CoV strain (Genbank accession no. NC\_004718) S gene sequence in terms  
101 of structure-defined domain profile of the SARS-CoV S protein (Fig. 1A). The gene of  
102 SARS-CoV-2 S ectodomain encoding amino acids (aa) 15-1,213 with removal of its  
103 original signal sequence was cloned to the downstream of the gp67 signal sequence in  
104 pAcgp67B plasmid vector (Fig.1B). and with its C-terminal addition of a thrombin  
105 cleavage site, a T4 trimerization foldon motif and his tag. The segments S1 (aa 15-

106 680) and RBD (aa 319-541) were cloned similar to S ectodomain, keeping gp67 signal  
107 peptide and his tag to facilitate secretory outside cell and affinity purification,  
108 respectively, but without the thrombin site and T4 foldon (Fig. 1A). The three  
109 constructed plasmids were respectively co-transfected into Sf9 insect cells with v-  
110 cath/chiA gene deficient baculovirus DNA for the generation and amplification of  
111 recombinant baculovirus, which were then harnessed to infect Hive Five insect cells to  
112 eventually produce recombinant proteins, named S, S1 and RBD respectively.

113 The recombinant proteins were mostly soluble expressed and secreted into the  
114 culture medium. The centrifugation supernatants of cell culture went through metal  
115 affinity chromatography using Ni-NTA resin. S, S1 and RBD proteins were mainly  
116 eluted in a separation fractions under 250 mM imidazole elution, and resolved as  
117 molecular weight (m.w.) of ~180 kDa, 110 kDa and 35 kDa, respectively, in SDS-  
118 PAGE as indicated by a corresponding western blotting (WB) using anti-His antibody  
119 as detection antibody (Fig. 1C). Interestingly, about one half S proteins were cleaved  
120 into S1 (identical migration site to S1 lane in Fig. 1C) and S2 (about 80kDa developed  
121 in anti-His WB) possibly by innate furin of insect cell that was also found in other cases  
122 of enzymatic cleave while protein expression in insect cell, such as Flu HA<sup>13</sup>. The  
123 eluted S fraction was further polished by Superdex 200 to remove contaminative  
124 proteins (Fig. 1D). These peaks fractionated at retention volume 28mL, 36mL, 48mL,  
125 and 65mL, were further harvested and subjected to SDS-PAGE analysis. The results  
126 indicated that S proteins together with cleaved S1/S2 were resolved at peak 1 in size-  
127 exclusion chromatography (Fig. 1D) and showed a high purity of over 95% total

128 S/S1/S2 in gel (Fig. 1E). Overall, one-step Ni-NTA affinity chromatography produced  
129 RBD with 95% purity and a yield of 30 mg per L cell culture, S1 with about 90% purity  
130 and 10 mg per L yield, while further purification through a size-exclusion  
131 chromatography (SEC), the resultant S sample had over 95% purity regarding intact S  
132 and cleaved S1/S2, and was harvested in a yield of 1 mg per L cell culture. These data  
133 set up a start point for further optimization on expression and purification process of  
134 SARS-CoV-2 S immunogen candidates through insect baculovirus expression vector  
135 system (BEVS).

136

### 137 **Physiochemical properties of SARS-CoV-2 S-RBD, S1 and S proteins**

138 We next investigated the physiochemical properties of the recombinant S protein and  
139 its fragments purified from insect cells, including association potential, thermal  
140 stability and glycosylation situation. Firstly, high pressure size-exclusion  
141 chromatography (HPSEC) and sedimentation velocity analytical ultracentrifugation  
142 (SV-AUC) analyses were carried out to measure the oligomerization potential of the  
143 three proteins in solution. RBD, S1 and S all showed single major peak in HPSEC  
144 profiles at elution volume of 9.0 mL, 5.5 and 5.3 mL, respectively (Fig. 2A and Fig.  
145 2B). RBD, S1 and S were further verified by SV-AUC, where RBD sedimented as  
146 single species of 3.1S in  $c(s)$  profile, corresponding to apparent molecular weight 22  
147 kDa (Fig. 2D); S1 existed as a dominant species of 11.3 S (estimated as 277 kDa  
148 corresponding to S1 trimer) and a minor aggregate form of 20 S (Fig. 2E); S and cleaved  
149 S1/S2 resolved as 15.2 S, equivalent to 577 kDa, approximately as the theoretical

150 molecular weight of intact S trimer. The three proteins were further analyzed by  
151 differential scanning calorimetry (DSC) that was usually used to investigate the inner  
152 thermostability of macromolecules or their complexes<sup>14</sup>. RBD and S1 showed one  
153 major peak at comparable thermal denaturation midpoints ( $T_m$ ) of 46.0 °C and 45.5 °C,  
154 respectively (Fig. 3G and 3H), whereas S sample showed two major peaks at  $T_m$  of  
155 45.5°C (identical to  $T_m$  of S1) and 64.5°C (Fig. 3I), which might reflect the coexistence  
156 of intact S and cleaved S1/S2.

157 On the other hand, we investigated the glycosylation extent of the three protein by  
158 enzymatic deglycosylation analysis. Endo H could unleash the chitobiose core of high  
159 mannose and some hybrid oligosaccharides from N-linked glycoproteins, therefore  
160 remove the extended branches of glycans and leave the one N acetylglucosamine  
161 (GlcNAc) on N-linked glycoproteins. While PNGase F would release N-linked glycan  
162 moieties between GlcNAc and ASN residues within a glycoprotein. It should be noted  
163 that glycosylation in insect cells is featured as terminal mannose glycans, unlike  
164 complex sialylated glycans in mammalian cells, and glycosylation is known to correlate  
165 the immunogenicity and broad-coverage protection of a glycoprotein immunogen<sup>15, 16</sup>.  
166 After the treatment of either Endo H or PNGase F, RBD showed no discernible decrease  
167 of molecular weight in SDS-PAGE/anti-His WB, S1 and S2 both demonstrated nearly  
168 ~10 kDa decrease, and the intact S exhibited substantial shrinkage in molecular weight  
169 of about ~20 kDa decrease (Fig. 2J). The analyses conclude that the glycosylation  
170 extent within S glycoprotein is RBD < S1 ~ S2, consistent to the predicted glycosylation  
171 profile of S polypeptide (Fig. 1A).



172

173 **Reactivity of SARS-CoV-2 RBD, S1 and S proteins against convalescent COVID-**  
174 **19 human sera**

175 We next evaluated the antigenicity of the three versions of S proteins by WB and ELISA  
176 using a panel of six COVID-19 convalescent human sera, which was collected from  
177 COVID-19 patients after they recovered from the disease in the First Affiliated Hospital  
178 of Xiamen University. Eight reducing SDS gel duplicates of the one depicted in Fig.  
179 1C were prepared for WB analysis using these six convalescent sera and two control  
180 sera from health human (Fig. 3A-3H, left panel). As expected, intact S protein bands  
181 reacted well with all the six convalescent sera (Fig. 3A-3H, left panel). Unexpectedly,  
182 five of six sera showed no or very weak reactivities against RBD, only Serum #6  
183 possessed RBD's activity. Among the five sera with lower RBD-reactivity, Serum #2,  
184 #3 and #5 well recognized S1 and the cleaved S1 in lane S, suggesting these sera may  
185 specifically react with NTD of S1. S2 demonstrated reaction activity against all the six  
186 sera, like the intact S. No detectable reaction was observed in the control sera (Fig. 3G  
187 and 3H). Inconsistent to the WB results, RBD, S1 and S shared comparable reactivities  
188 against the convalescent sera in ELISA, although the sera per se presented varied  
189 reaction titers (represented as ET50) following the reaction sequence: Serum #5 > #2 >  
190 #3 > #1 > #6 > #4 (Fig. 3A-3H, right panel).

191 Taken together, RBD, S1 and S proteins from insect cells maintain the native-like  
192 SARS-CoV-2 epitopes. These epitopes in native virion should be immunogenic in  
193 COVID-19 patients and capable of eliciting high antibody titer in the convalescent

194 phase of SARS-CoV-2 infection. Among these epitopes, most RBD epitopes are strictly  
195 tertiary conformation-dependent sites that are damaged upon the mild denatured  
196 condition of reductant and SDS treatment, NTD within S1 bears some linear epitopes,  
197 whereas S2 part essentially has linear epitopes that are immunogenic in all COVID-19  
198 patients (n=6).

199

### 200 **Cryo-EM structures of SARS-CoV-2 S proteins**

201 To examine the structure of the trimeric S ectodomain with native sequence, we  
202 prepared cryo-EM grids using the Ni-NTA purified S proteins and collected 1,513  
203 electron micrograph movies. Most of motion-corrected micrographs demonstrated  
204 plenty of well-dispersed particles with an approximate size as the canonical coronavirus  
205 S trimer (Fig. 4A). A total of 162,645 particles were picked out for multiple rounds of  
206 2D classification, consequently, 37,147 particles grouped into top 10 classes, rendering  
207 typical feature of S trimer in prefusion conformation as recently reported<sup>7, 10</sup>, were  
208 selected for further analysis (Fig. 4B). 3D reconstruction (applying 3-fold symmetry)  
209 yielded the density map of prefusion spike (S-pre) at resolution of 5.43 Å (Fig. 3D and  
210 Supplementary Fig. 1A).

211 Structurally, three S monomers intertwine around each other and associate to  
212 homotrimers with 145 Å height seen from side-view and 160 Å diameter in top-view  
213 (Fig. 4C and 4D). We then recruited the recently reported cryo-EM map of S prefusion  
214 trimer (EMD-21374, at resolution of 3.17 Å, low pass to 5.43 Å prior to structural  
215 comparison) and compared our cryo-EM map at same resolution (Fig. 4D). It was

216 worthy noted that the compared prefusion SARS-CoV-2 S trimer was engineered with  
217 site-directed mutations to stabilize prefusion conformation and expressed in 239F cells.  
218 The mutant included two stabilizing proline mutations at residues 986, 987 and a  
219 “GSAS” substitution at the furin cleavage site<sup>7</sup>. Surprisingly, the alignment  
220 demonstrated that the two cryo-EM structures share similar mushroom-shaped  
221 architecture in particular nearly identical at stalk moiety (S2 region), but our S-pre  
222 shows the cap part (S1 region) at ~15Å lower position than the reported S trimer in  
223 RBD-down prefusion conformation (Fig. 4D). Regarding to substantial mismatch at the  
224 density of 3 S1 subunits, we respectively fitted 5 individual domains (NTD, RBD, SD1,  
225 SD2 and S2) of the SARS-CoV-2 S structure (PDB code 6VSB) to our S-pre map. In  
226 the fitting map, NTD, RBD, SD2 and S2 could be well placed in the S-pre map,  
227 especially for the latter two, which reflects the aforementioned good match at the stalk  
228 of the mushroom-shape (Supplementary Fig. 2). However, there is no observable  
229 density between RBD and SD2 to accommodate an SD1 model (Supplementary Fig. 2),  
230 which suggests SD1 region is dramatically flexible in our S-pre structure (Fig. 4E and  
231 4F). When the combined model of fitted NTD-RBD-SD2-S2 was superimposed to the  
232 original S protomer structure (PDB code 6VSB, Chain A, RBD in down conformation),  
233 both NTD and RBD in the original S obviously move and rotate up against our  
234 combined model (Fig. 4G). The structural comparison demonstrated that the S-pre  
235 trimer retains a unique conformation different from the prefusion conformation of the  
236 two reported SARS-CoV-2 spike structures (PDB codes 6VSB and 6VXX).

237 We then compared the conformation of our S-pre structure with that of 21  
238 deposited coronavirus S models. Six representative S structures<sup>7, 17-20</sup> from four known  
239 genus ( $\alpha$ -,  $\beta$ -,  $\gamma$ - and  $\delta$ -genus) in coronaviridae are respectively fitted to the S-pre map  
240 (Supplementary Fig. 3). Five S trimer structures of other coronaviruses share similar  
241 prefusion conformation with the reported SARS-CoV-2 S structure but substantially  
242 distinct with the unique conformation of our S-pre.

243 Apart from most particles classified as S-pre in our sample, 2D classifications also  
244 showed five classes of few particles (2,951) assuming an elongated rosette-shape  
245 assembly. These particles were further reconstructed and yielded a structure at lower  
246 resolution of 8.40 Å (Supplementary Fig. 1B) that could be considered as post-fusion  
247 spike (S-post), as the structure has similar shape but shorter length (~170 Å) as  
248 compared to the postfusion spike of SARS-CoV<sup>21</sup> and the presumed one observed in  
249 native SARS-CoV-2 virion (BioRxiv, <https://doi.org/10.1101/2020.03.02.972927>)  
250 (Supplementary Fig. 4). Fitting the S-post map with the core region structure of SAR-  
251 CoV-2 S2 subunit in post-fusion conformation (PDB code 6LXT) indicated that our S-  
252 post exhibits roughly rod shape similar with the post-fusion structure (Supplementary  
253 Fig. 4).

254

## 255 **Conformational transition of SARS-CoV-2 spike from early prefusion to** 256 **postfusion**

257 Briefly, we've obtained two conformations of SARS-CoV-2 spike from insect cells.

258 The dominant one maintains the similar mushroom-shaped trimer as the previous

259 models, while the S1 region substantially diverges. The other conformation essentially  
260 resembles the postfusion state. However, we could not find the classic prefusion  
261 conformation in our sample. We next tried to figure out at which stage the unique  
262 conformation occurs during the spike conformation change. The space relationship of  
263 NTD or RBD to S2 domain in the unique, RBD-down and RBD-up prefusion  
264 conformations (Fig. 5A) was measured by a reference plane approximately parallel to  
265 the viral membrane. The plane is defined by the positions of three equivalent C $\alpha$  atoms  
266 (residue 694 be used) from three S2 subunits of the trimer structures. Numerical data  
267 shows that (1) the NTD and RBD in the unique conformation retain the lowest position  
268 in the three prefusion conformations; (2) the NTD and RBD of RBD-down prefusion  
269 stretch upward 16.6° rotation/16 Å elevation, and 13.1°/18 Å, respectively, with respect  
270 to the unique conformation; (3) from RBD-down to RBD-up prefusion state, the RBD  
271 elevates 9 Å with an additional rotation whereas the NTD remaining nearly stationary  
272 (Supplementary Movie S1). The resultant “up” RBD is ready for ACE2 binding and  
273 the spike eventually is rearranged to postfusion state upon RBD-ACE2 interaction<sup>11, 22</sup>  
274 (Fig. 5B). The motion trend of NTD and RBD from prefusion to postfusion state in  
275 conformational transition is away from the viral membrane, suggesting the unique  
276 conformation may occur earlier than RBD-down prefusion conformation, named as  
277 “early prefusion conformation” (Fig. 5). This early prefusion conformation might exist  
278 in other coronaviruses as well.

279

280

281 **Discussion**

282 SARS-CoV-2 has crossed the species barrier and sweep over the planet by person-to-  
283 person transmission in an  $R_0 \sim 2.56$  rate<sup>23</sup>, first wave in China and the second wave  
284 booming outside China. WHO has declared the event as another pandemic infectious  
285 disease in human history, and the epidemiology of SARS-CoV-2 infection is still in  
286 data accumulation. Although the biology and virology of SARS-CoV-2 remain elusive,  
287 in terms of knowledge on other coronaviruses, the spikes decorating the SARS-CoV-2  
288 virion play a critical role in viral attachment and entry to host cells. Cryo-EM structures  
289 of spikes in the prefusion conformation, and RBD-bound receptor ACE2 have indicated  
290 the engagement of SARS-CoV-2 to cellular membrane requires a serial of  
291 conformational change of RBDs. The change is presumed from the start point of 3  
292 RBDs down in the prefusion conformation, then RBD(s) up for ACE2 binding, and  
293 eventually spike is rearranged to postfusion. In this study, we suggest that the SARS-  
294 CoV-2 spike may retain at more precedent state than the classic prefusion conformation  
295 that has been determined for other coronaviruses. This early prefusion conformation  
296 features that the cap of the mushroom-shaped spike constituted by three S1 subunits is  
297 more proximal to viral membrane by 15 Å than in the classic prefusion conformation.

298 The SARS-CoV-2 spike expressed in insect cells predominantly retains a unique  
299 early prefusion conformation, which was repeatable in at least three batches of samples  
300 and is ascribed to two possible reasons – native aa sequence used in the S ectodomain  
301 construct and over-expression in insect cells. There is about a half of S proteins  
302 undergoing cleavage on the S1/S2 boundary site in the purified samples both after the

303 first Ni-NAT and the second SEC purification (Fig. 1C and 1E). Further analyses  
304 suggest the split between S1 and S2 likely takes no effect on the trimerization of S  
305 trimer. It is known that the insect cells can confer post-translation glycosylation for  
306 protein over-expression as mammalian cells despite the latter can produce more  
307 complex sialylation<sup>24</sup>, and thus provide an alternative way to generate glycoprotein in  
308 native conformation. Our results indicate that RBD, NTD and S2 domains of SARS-  
309 CoV-2 demonstrated different glycosylation extent in insect cells, however, RBD, S1  
310 and S proteins comparably react well with six convalescent COVID-19 human sera  
311 albeit they differ in domain composition, polypeptide length and oligomerization.

312 There are numbers of SARS-CoV-2 vaccine candidates, including inactivated,  
313 vectored, recombinant and nucleotide vaccine forms, under preclinical research.  
314 Various versions of S proteins are the major targets for vaccine immunogen candidate.  
315 In addition to potent neutralizing antibody elicitation upon immunization, potential  
316 antibody-dependent disease enhancement (ADE) is the major concern for an efficacious  
317 SARS-CoV-2 vaccine. ADE has been found in the development of numbers of virus  
318 vaccine candidates, including respiratory syndrome virus (RSV), dengue fever<sup>25, 26</sup>,  
319 human immunodeficient virus (HIV), SARS-CoV, MERS-CoV<sup>25-27</sup> and so on. It is  
320 believed that ADE is associated with non-neutralization epitope attribute and / or  
321 specific antibody isotype<sup>28, 29</sup>, in which virus-bound antibody would promote the viral  
322 infection to immune cells through Fc fragment targeting  $\gamma$ Fc receptors on the cellular  
323 surface and enhance the disease severity. Therefore, the strategy of vaccine design  
324 against SARS-CoV-2 should include the consideration of antigen region selection,

325 glycosylation number/extent and exactly presented prefusion conformation. The  
326 prefusion conformation needed to be maintained is exemplified by the case of RSV  
327 vaccine candidate in which F trimer in prefusion is much potent than postfusion<sup>30-32</sup>.  
328 Hence the early prefusion conformation proposed for SARS-CoV-2 spike should be  
329 drawn an attention for immunogen design as well as the prefusion one.

330 In conclusion, we obtain three kinds of S proteins showing excellent antigenicity  
331 and find an early prefusion conformation for SARS-CoV-2 spike. Nevertheless, the  
332 molecular level detail for such conformation and the underlying immunogenicity  
333 should be further investigated, and whether this conformation recapitulates the exact  
334 state of spike in native SARS-CoV-2 virion remains to be determined.

335

## 336 **Materials and Methods**

### 337 **Cloning, protein expression and purification**

338 The SARS-CoV-2 S gene (Genbank accession no. NC\_045512.2) was synthesized and  
339 cloned into a baculovirus shuttle vector pAcgp67B (BD Biosciences, CA, USA) using  
340 Gibson assembly. The S construct encoding aa 15-1,213 (numbered as original  
341 sequence), contains a thrombin site, a T4 foldon domain to assist in trimerization and a  
342 C-terminal 10-His tag for purification. For S1 construct contains gene encoding aa 15-  
343 680 followed by a 10-His tag. The RBD construct (aa 319-541) also contains 10-his tag  
344 to facilitate purification. In all three constructs, the natural signal peptide (aa 1-14  
345 analyzed by SignalP tool) was replaced with a gp67 secretion signal peptide at N-  
346 terminus.



347 The expression and purification of proteins were performed as described  
348 previously<sup>33</sup>. All plasmids were co-transfected with linearized 2.0 DNA (deficient in *v-*  
349 *cath/chiA* genes) (Expression Systems, CA, USA) into *Sf9* insect cells (Thermo Fisher  
350 Scientific, MA, USA), according to the protocol provided by the manufacturer  
351 (Expression Systems). The transfection supernatant was harvested and amplified 2  
352 times to obtain a high titer of the recombinant viruses. Hive Five cells (BTI-TN-5B1-  
353 4) (Thermo Fisher Scientific) were cultured in ESF921 medium (Expression Systems)  
354 and infected with recombinant virus at an multiplicity of infection (MOI) of 5 in the  
355 exponential growth phase ( $2 \times 10^6$  cells/ml, 95% viability) at 28°C for 72 h. The culture  
356 media was centrifugated at 8,000 rpm for 20 min. Then the supernatant was dialyzed  
357 against phosphate-buffered saline (PBS), pH 7.4, and purified with Ni-sepharose fast  
358 flow 6 resin (GE Healthcare, Boston, USA) by the elution with 250 mM imidazole. The  
359 protein concentrations of the final purified samples were measured with Pierce™ BCA  
360 Protein Assay Kit (Thermo Fisher Scientific).

361

### 362 **SDS-PAGE and western blot**

363 Protein samples were mixed with loading buffer and boiled for 10 min, and subjected  
364 to sodium dodecyl sulfate-polyacrylamide gel electrophoresis (SDS-PAGE). Equal  
365 amounts of proteins for each sample were loaded onto two SDS-PAGE gels, one for  
366 western blotting and one for Coomassie staining. The proteins were electrophoresed for  
367 70 min at 80 V in a BioRad MINI-PROTEAN Tetra system (BioRad Laboratories, CA,  
368 USA), and the gel was stained with Coomassie Brilliant Blue R-250 (Bio-Rad) for 30

369 min at room temperature. For western blotting, separated proteins were transferred onto  
370 a nitrocellulose membrane (Whatman, Dassel, Germany) using a Trans-Blot Turbo  
371 transfer system (Bio-Rad). The membrane was blocked and then incubated for 1 h with  
372 an His-tag-specific mouse mAb antibody (Proteintech, Rosemont, USA) or human sera  
373 (1:500 dilution). Unbound antibody was removed by five 5-min washes and the  
374 membrane was incubated with alkaline phosphatase-conjugated goat anti-mouse  
375 secondary antibody or goat anti-human IgG secondary antibody (Abcam, Cambridge,  
376 UK). Membranes were washed again and then developed using SuperSignal ELISA  
377 Pico Chemiluminescent Substrate Kit (Thermo Fisher Scientific).

378

### 379 **Enzyme-Linked Immunosorbent Assay (ELISA)**

380 Purified proteins were coated onto 96-well microtiter plates at 100 ng/well in PBS at  
381 37°C for 4 h. The background was blocked with 1 × Enzyme dilution buffer (PBS +  
382 0.25% casein + 1% gelatin + 0.05% proclin-300) at 37°C for 2 h. Sera were diluted  
383 started at 1:100 followed with three-fold serially dilution, and added to the wells (100 µl)  
384 and incubated at 37°C for 1 h. Horseradish peroxidase (HRP)-labeled mouse anti-  
385 human antibody (Abcam) was used as secondary antibody at 1:5,000 for 30 min. Wells  
386 were washed again and the reaction catalyzed using o-phenylenediamine (OPD)  
387 substrate at 37°C for 10 min. The OD<sub>450nm</sub> (reference, OD<sub>620nm</sub>) was measured on  
388 a microplate reader (TECAN, Männedorf, Switzerland), with a cut-off value 0.1. The  
389 Half effective titers (ET<sub>50</sub>) was calculated by sigmoid trend fitting using GraphPad  
390 Prism software.

391 **Size-Exclusive Chromatography (SEC)**

392 Ni-NTA purified S proteins were further loaded into Superdex200 (GE Healthcare), the  
393 fractions were harvested and analyzed by SDS-PAGE. All high-purity RBD, S1 and S  
394 proteins were subjected to HPLC (Waters; Milford, MA) analysis using a TSK Gel  
395 G5000PWXL7.8 × 300 mm column (TOSOH, Tokyo, Japan) equilibrated in PBS, pH  
396 7.4. The system flow rate was maintained at 0.5 mL/min and eluted proteins were  
397 detected at 280 nm.

398

399 **Analytical Ultracentrifuge (AUC)**

400 The AUC assay was performed using a Beckman XL-Analytical ultracentrifuge  
401 (Beckman Coulter, Fullerton, CA), as described elsewhere<sup>34</sup>. The sedimentation  
402 velocity (SV) was carried out at 20°C with diluted proteins in PBS. The AN-60 Ti rotor  
403 speed was set to 20,000-30,000 rpm according to the molecular weight of the control  
404 proteins. Data was collected using SEDFIT computer software, kindly provided by Dr.  
405 P. C. Shuck (NIH, Bethesda, MA, USA). Multiple curves were fit to calculate the  
406 sedimentation coefficient (S) using continuous sedimentation coefficient distribution  
407 model [c(s)], and then the c(s) used to estimate protein molar mass.

408

409 **Differential scanning calorimetry (DSC)**

410 Differential scanning calorimetry (DSC) was carried out on the S proteins using a  
411 MicroCal VP-DSC instrument (GE Healthcare, MicroCal Products Group,  
412 Northampton, MA) as described previously<sup>14</sup>. In brief, all samples with a concentration

413 of 0.2 mg/mL were measured at a heating rate of 1.5°C /min with the scan temperature  
414 ranging from 10°C to 90°C. The melting temperatures ( $T_m$ ) were calculated using  
415 MicroCal Origin 7.0 (Origin-Lab Corp., Northampton, MA) software assuming a non-  
416 two-state unfolding model.

417

#### 418 **Endo-H and PNGase-F digestion**

419 The Endo-H (NEB) and PNGase-F (NEB) digestions were performed according to the  
420 protocol offered by instruction. In brief, the deglycosylation reactions were carried out  
421 using 10ug S proteins with 5uL of Endo H or PNGase F and incubated at 37°C  
422 overnights. The reactions were loaded in to SDS-PAGE and analyzed by Western  
423 blotting using anti-His as detecting anybody.

424

#### 425 **Cryo-EM sample preparation and data collection.**

426 Aliquots (3  $\mu$ L) of 0.5 mg/mL purified SARS-CoV-2 S protein were loaded onto glow-  
427 discharged (60 s at 20 mA) holey carbon Quantifoil grids (R1.2/1.3, 200 mesh,  
428 Quantifoil Micro Tools) using a Vitrobot Mark IV (ThermoFisher Scientific) at 100%  
429 humidity and 4°C. Data were acquired using the EPU software to control a FEI Tecnai  
430 F30 transmission electron microscope (ThermoFisher Scientific) operated at 300 kV.  
431 and equipped with a ThermoFisher Falcon-3 direct detector. Images were recorded in  
432 the 58-frame movie mode at a nominal magnification of 93,000X with a pixel size of  
433 1.12 Å. The total electron dose was set to 46  $e^- \text{Å}^{-2}$  and the exposure time was 1.5 s.

434 537 micrographs were collected with a defocus range comprised between 1.5 and 2.8  
435  $\mu\text{m}$ .

436

### 437 **Cryo-EM data processing**

438 Movie frame alignment and contrast transfer function estimation of each aligned  
439 micrograph were carried out with the programs Motioncor<sup>35</sup> and Gctf<sup>36</sup>. Particles were  
440 picked by the ‘Template picker’ session of cryoSPARC v2<sup>37</sup>. Two rounds of reference-  
441 free 2D classification were performed and well-defined particle images were selected  
442 and non-uniform 3D refinement, 3D reconstruction with C3 symmetry were performed  
443 using cryoSPARC v2. The resolutions of the final maps were estimated on the basis of  
444 the gold-standard FSC curve with a cutoff at 0.143<sup>38</sup>. Density-map-based visualization  
445 and segmentation were performed with Chimera<sup>39</sup>.

446

### 447 **Acknowledgments**

448 This work was supported by grants from the National Natural Science Foundation  
449 (grant no. U1705283, 31670935, 81971932, 81991491, 31730029), and the Major  
450 Project of Fujian Provincial Science Foundation for COVID-19 Research (Grants  
451 2020YZ014001).

452

### 453 **Financial Disclosure**

454 The funders had no role in study design, data collection and analysis, decision to publish,  
455 or preparation of the manuscript.

456

## 457 **Competing Interest**

458 The authors have declared that no competing interests exist.

459

## 460 **Author Contributions**

461 Y.G, S.L. and N.X. designed the study. T.L., Q.Zheng., H.Y., D.W., W.X., Y.Z.,

462 X.H., L.Z., Z.Zhang., Z.Zhai., T.C., Z.W., J.C., H.S. and T.D. performed experiments.

463 T.L., Q.Z., H.Y., Y.W., Y.C., Q.Zhao., J.Z., Y.G., S.L. and N.X. analyzed data. T.L.,

464 Q.Z., H.Y., Y.G., and S.L. wrote the manuscript. T.L., Q.Zheng., H.Y., D.W., W.X.,

465 Q.Zhao., J.Z. Y.G., S.L., and N.X. participated in discussion and interpretation of the

466 results. All authors contributed to experimental design.

467

## 468 **References**

469 1 Chan JF, Kok KH, Zhu Z *et al.* Genomic characterization of the 2019 novel human-pathogenic  
470 coronavirus isolated from a patient with atypical pneumonia after visiting Wuhan. *Emerg Microbes*  
471 *Infect* 2020; **9**:221-236.

472 2 Zhu N, Zhang D, Wang W *et al.* A Novel Coronavirus from Patients with Pneumonia in China,  
473 2019. *N Engl J Med* 2020; **382**:727-733.

474 3 Wang D, Hu B, Hu C *et al.* Clinical Characteristics of 138 Hospitalized Patients With 2019 Novel  
475 Coronavirus-Infected Pneumonia in Wuhan, China. *JAMA* 2020.

476 4 Zhou P, Yang XL, Wang XG *et al.* A pneumonia outbreak associated with a new coronavirus of  
477 probable bat origin. *Nature* 2020; **579**:270-273.

478 5 Wan Y, Shang J, Graham R, Baric RS, Li F. Receptor recognition by novel coronavirus from Wuhan:  
479 An analysis based on decade-long structural studies of SARS. *J Virol* 2020.

480 6 Millet JK, Whittaker GR. Host cell proteases: Critical determinants of coronavirus tropism and  
481 pathogenesis. *Virus Research*; **202**:120-134.

482 7 Wrapp D, Wang N, Corbett KS *et al.* Cryo-EM structure of the 2019-nCoV spike in the prefusion  
483 conformation. *Science (New York, NY)* 2020.

484 8 Walls AC, Xiong X, Park Y-JJ *et al.* Unexpected Receptor Functional Mimicry Elucidates Activation  
485 of Coronavirus Fusion. *Cell* 2019; **176**:1026.

486 9 Yuan Y, Cao D, Zhang Y *et al.* Cryo-EM structures of MERS-CoV and SARS-CoV spike

- 487 glycoproteins reveal the dynamic receptor binding domains. *Nature communications* 2017;  
488 **8**:15092.
- 489 10 Walls AC, Park Y-JJ, Tortorici MA, Wall A, McGuire AT, Velesler D. Structure, Function, and  
490 Antigenicity of the SARS-CoV-2 Spike Glycoprotein. *Cell* 2020.
- 491 11 Gui M, Song W, Zhou H *et al.* Cryo-electron microscopy structures of the SARS-CoV spike  
492 glycoprotein reveal a prerequisite conformational state for receptor binding. *Cell research* 2017;  
493 **27**:119-129.
- 494 12 Lu S. Timely development of vaccines against SARS-CoV-2. *Emerg Microbes Infect* 2020; **9**:542-  
495 544.
- 496 13 Sui J, Hwang WC, Perez S *et al.* Structural and functional bases for broad-spectrum  
497 neutralization of avian and human influenza A viruses. *Nature structural & molecular biology* 2009;  
498 **16**:265-273.
- 499 14 Zhang X, Wei M, Pan H *et al.* Robust manufacturing and comprehensive characterization of  
500 recombinant hepatitis E virus-like particles in Hecolin(®). *Vaccine* 2014; **32**:4039-4050.
- 501 15 Medina RA, Stertz S, Manicassamy B *et al.* Glycosylations in the globular head of the  
502 hemagglutinin protein modulate the virulence and antigenic properties of the H1N1 influenza  
503 viruses. *Science translational medicine* 2013; **5**.
- 504 16 Liu W-CC, Jan J-TT, Huang Y-JJ, Chen T-HH, Wu S-CC. Unmasking stem-specific neutralizing  
505 epitopes by abolishing N-linked glycosylation sites of influenza hemagglutinin proteins for vaccine  
506 design. *Journal of virology* 2016.
- 507 17 Walls AC, Tortorici MA, Frenz B *et al.* Glycan shield and epitope masking of a coronavirus spike  
508 protein observed by cryo-electron microscopy. *Nat Struct Mol Biol* 2016; **23**:899-905.
- 509 18 Yuan Y, Cao D, Zhang Y *et al.* Cryo-EM structures of MERS-CoV and SARS-CoV spike  
510 glycoproteins reveal the dynamic receptor binding domains. *Nature communications* 2017;  
511 **8**:15092.
- 512 19 Shang J, Zheng Y, Yang Y *et al.* Cryo-EM structure of infectious bronchitis coronavirus spike  
513 protein reveals structural and functional evolution of coronavirus spike proteins. *PLoS Pathog* 2018;  
514 **14**:e1007009.
- 515 20 Shang J, Zheng Y, Yang Y *et al.* Cryo-Electron Microscopy Structure of Porcine Deltacoronavirus  
516 Spike Protein in the Prefusion State. *J Virol* 2018; **92**.
- 517 21 Song W, Gui M, Wang X, Xiang Y. Cryo-EM structure of the SARS coronavirus spike glycoprotein  
518 in complex with its host cell receptor ACE2. *PLoS Pathog* 2018; **14**:e1007236.
- 519 22 Yan R, Zhang Y, Li Y, Xia L, Guo Y, Zhou Q. Structural basis for the recognition of the SARS-  
520 CoV-2 by full-length human ACE2. *Science (New York, NY)* 2020.
- 521 23 Zhao S, Musa SS, Lin Q *et al.* Estimating the Unreported Number of Novel Coronavirus (2019-  
522 nCoV) Cases in China in the First Half of January 2020: A Data-Driven Modelling Analysis of the  
523 Early Outbreak. *Journal of clinical medicine* 2020; **9**.
- 524 24 Palomares LA, Srivastava IK, Ramírez OT, Cox MMJM. Glycobiotechnology of the Insect Cell-  
525 Baculovirus Expression System Technology. *Advances in biochemical engineering/biotechnology*  
526 2018.
- 527 25 Wang SF, Tseng SP, Yen CH *et al.* Antibody-dependent SARS coronavirus infection is mediated  
528 by antibodies against spike proteins. *Biochem Biophys Res Commun* 2014; **451**:208-214.
- 529 26 Wan Y, Shang J, Sun S *et al.* Molecular Mechanism for Antibody-Dependent Enhancement of  
530 Coronavirus Entry. *J Virol* 2020; **94**.

- 531 27 Kam YW, Kien F, Roberts A *et al.* Antibodies against trimeric S glycoprotein protect hamsters  
532 against SARS-CoV challenge despite their capacity to mediate FcγRII-dependent entry into  
533 B cells in vitro. *Vaccine* 2007; **25**:729-740.
- 534 28 Dejnirattisai W, Supasa P, Wongwiwat W *et al.* Dengue virus sero-cross-reactivity drives  
535 antibody-dependent enhancement of infection with zika virus. *Nature immunology* 2016;  
536 **17**:1102-1108.
- 537 29 Rey FAA, Stiasny K, Vaney M-CC, Dellarole M, Heinz FX. The bright and the dark side of human  
538 antibody responses to flaviviruses: lessons for vaccine design. *EMBO reports* 2018; **19**:206-224.
- 539 30 Ngwuta JO, Chen M, Modjarrad K *et al.* Prefusion F-specific antibodies determine the  
540 magnitude of RSV neutralizing activity in human sera. *Science translational medicine* 2015; **7**.
- 541 31 Crank MC, Ruckwardt TJ, Chen M *et al.* A proof of concept for structure-based vaccine design  
542 targeting RSV in humans. *Science* 2019; **365**:505-509.
- 543 32 McLellan JS, Chen M, Joyce MG *et al.* Structure-based design of a fusion glycoprotein vaccine  
544 for respiratory syncytial virus. *Science (New York, NY)* 2013; **342**:592-598.
- 545 33 Li T, Zhang Z, Zhang Z *et al.* Characterization of native-like HIV-1 gp140 glycoprotein  
546 expressed in insect cells. *Vaccine* 2019; **37**:1418-1427.
- 547 34 Li Z, Wang D, Gu Y *et al.* Crystal Structures of Two Immune Complexes Identify Determinants  
548 for Viral Infectivity and Type-Specific Neutralization of Human Papillomavirus. *mBio* 2017; **8**.
- 549 35 Zheng SQ, Palovcak E, Armache J-P, Verba KA, Cheng Y, Agard DA. MotionCor2: anisotropic  
550 correction of beam-induced motion for improved cryo-electron microscopy. *Nature methods*  
551 2017; **14**:331.
- 552 36 Zhang K. Gctf: Real-time CTF determination and correction. *Journal of structural biology* 2016;  
553 **193**:1-12.
- 554 37 Punjani A, Rubinstein JL, Fleet DJ, Brubaker MA. cryoSPARC: algorithms for rapid unsupervised  
555 cryo-EM structure determination. *Nat Methods* 2017; **14**:290-296.
- 556 38 Kucukelbir A, Sigworth FJ, Tagare HD. Quantifying the local resolution of cryo-EM density maps.  
557 *Nature methods* 2014; **11**:63.
- 558 39 Pettersen EF, Goddard TD, Huang CC *et al.* UCSF Chimera—a visualization system for  
559 exploratory research and analysis. *Journal of computational chemistry* 2004; **25**:1605-1612.
- 560



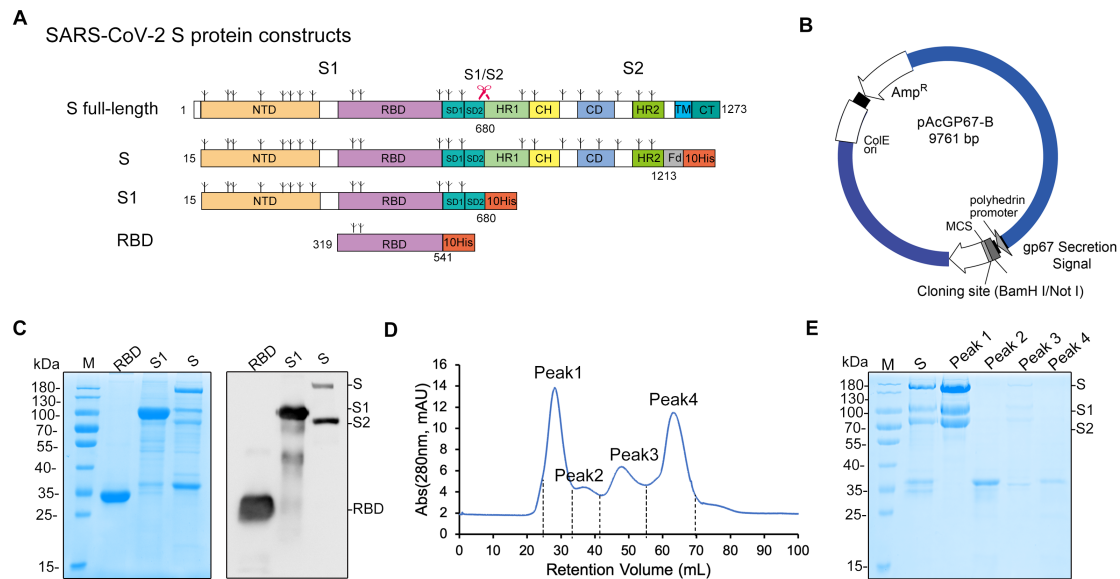

561

562 **Figure 1. Schematic map of the SARS-CoV-2 S protein constructs.** (A) Linear

563 representations of the S protein primary structure and construct design. NTD, N-

564 terminal domain; RBD, receptor binding domain; SD1, subdomain 1; SD2, subdomain

565 2; HR1, heptad repeat 1; CH, central helix; CD, connector domain; HR2, heptad repeat

566 2; TM, transmembrane domain; CT, cytoplasmic tail; FD, T4 foldon motif. The

567 predicted glycosylation sites are indicated above the domain bars. (B) Map of the

568 cloning vector pAcgp67B. The interest genes were cloned to plasmid pAcgp67B at

569 BamH I/Not I site to generate transfer vectors. (C) SDS-PAGE and western blotting of

570 the Ni-NTA purified proteins. RBS, S1 and S were eluted by 250 mM imidazole. Anti-

571 His antibody was used as detection antibody in western blotting. (D) Size-exclusion

572 chromatogram of the second-step purification of the S protein. (E) SDS-PAGE of the

573 four fractions harvested from the chromatography purification as shown in (D).

574

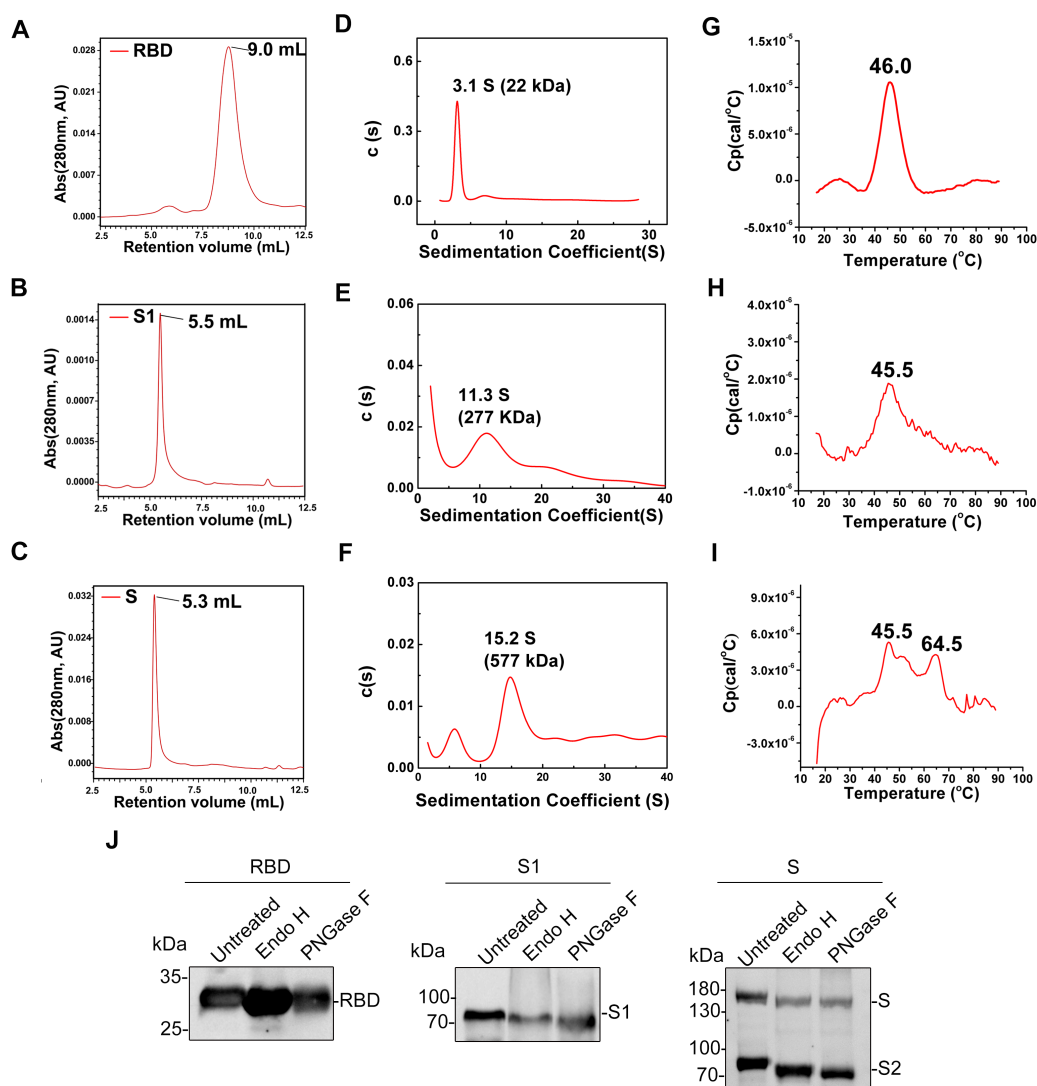

575

576 **Figure 2. Characterization of the purified RBD, S1 and S proteins.** (A-C) HPSEC

577 profiles of the purified RBD, S1 and S proteins; (D-F) AUC profiles of RBD, S1 and

578 S proteins; (G-I) DSC profiles of RBD, S1 and S proteins. (J) Western blotting of

579 three purified proteins treated with Endo H and PNGase F or untreated as control.

580 Anti-His antibody was used as detection antibody in western blotting.

581

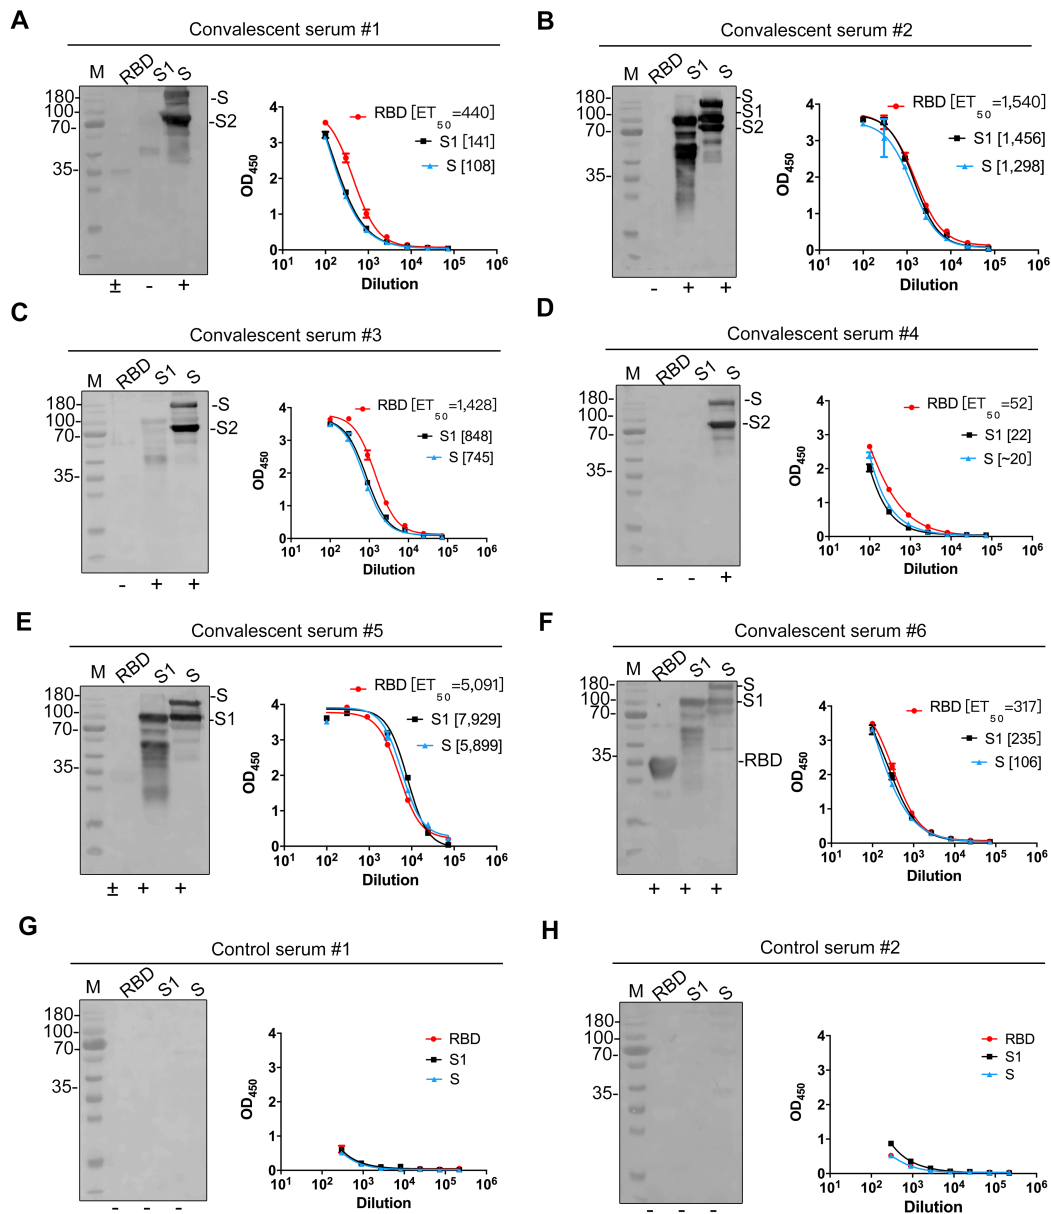

582

583 **Figure 3. Antigenicity of RBD, S1 and S proteins against convalescent sera. (A-F)**

584 The reactivity of the RBD, S1 and S proteins against six COVID-19 convalescent

585 human sera (#1-#6) by western blotting (left panel) and ELISA (Right panel). (G, H)

586 Results of two control sera. The gels used for western blotting were duplicates of the

587 reducing SDS gels same as Fig. 1C.

588

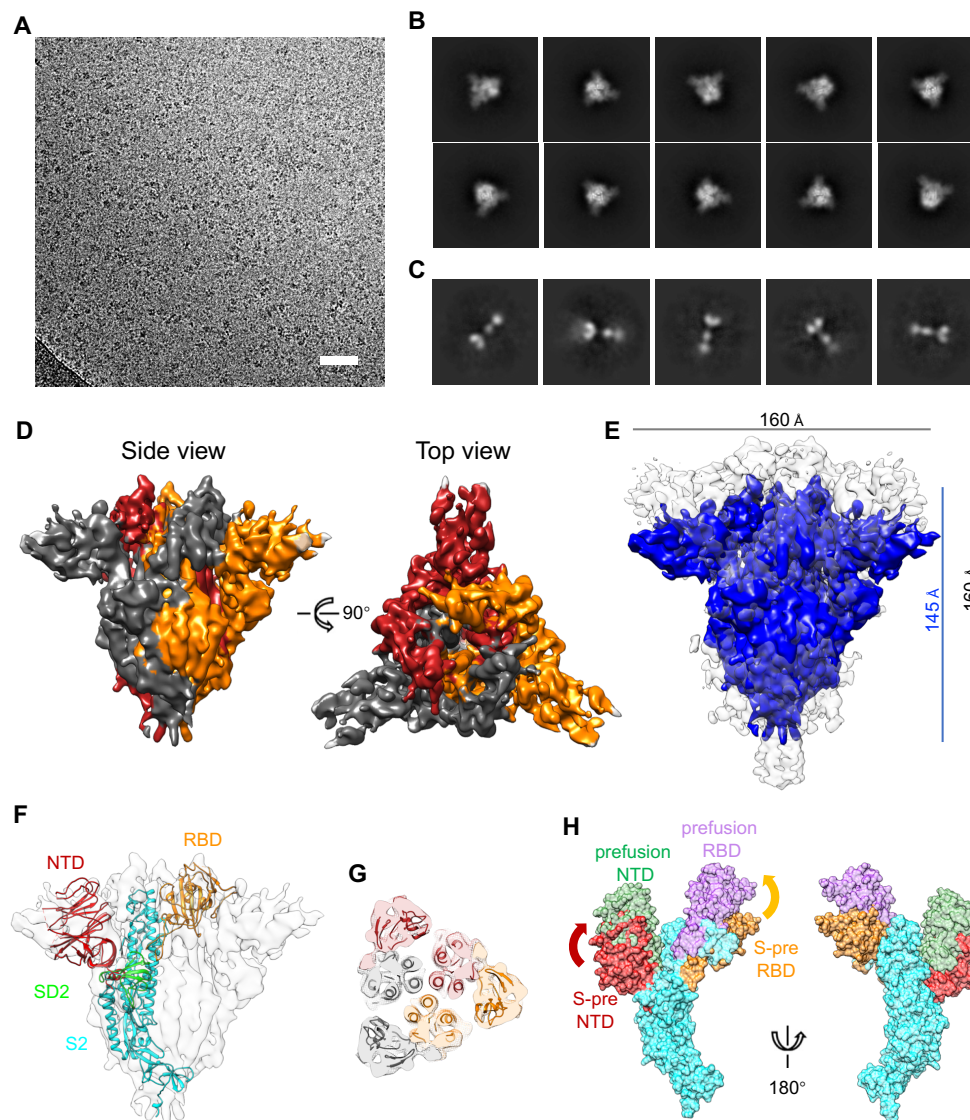

589

590 **Figure 4. Cryo-EM structure of the SARS-CoV-2 S trimer.** (A) Representative  
591 micrograph of frozen-hydrated SARS-CoV-2 S particles, Scale bar 50nm. (B, C) Ten and five  
592 selected class averages showing the particles along different orientations belonging to prefusion (B)  
593 and postfusion (C) S protein, respectively. (D) 5.43 Å density map of prefusion S trimer (S-pre) that  
594 is colored by protomer. (E) Structural comparison to the reported prefusion SARS-CoV-2 S trimer  
595 (EMD-21374, C3 symmetry, low-pass to 5.43Å) show a different conformation of S-pre (~15Å  
596 shorter in height). (F, G) Each domain of the model of prefusion SARS-CoV-2 S monomer (F) or  
597 trimer (G) (PDB no. 6VSB) were separately fitted in the density map of S-pre. (H) Schematic

598 diagram shows conformational diversities between NTD and RBD of S-pre (NTD: red, RBD:

599 orange) and reported prefusion S (NTD: light green, RBD: light purple).

600

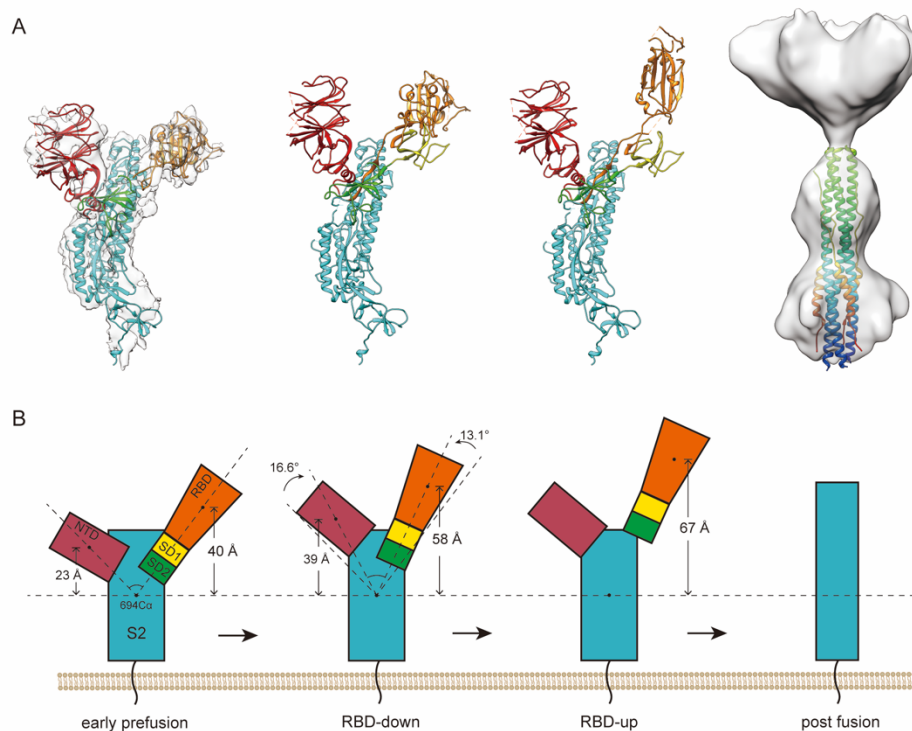

601

602 **Figure 5. SARS-CoV-2 S spike at early pre-, pre- and post-fusion states and the**

603 **proposed timeline for conformation change. (A) Four conformations of SARS-CoV-**

604 **2 S spike. For clarity, only one monomer at early prefusion, RBD down prefusion and**

605 **RBD up prefusion conformation is shown in ribbon mode. The model fitted in our S-**

606 **pre map is a combined model comprised of individually fitted NTD, RBD, SD2 and S2**

607 **domain, which were evicted from the model of prefusion S trimer (PDB no. 6VSB). A**

608 **deposited postfusion core of SARS-CoV-2 S2 subunit (PDB no. 6LXT) is fitted to our**

609 **S-post map. Domains are designated by different colors, red: NTD, orange: RBD,**

610 **yellow: SD1, green: SD2 and cyan: S2. (B) Simplified schematic diagram of the S**

611 **monomer interpreting the conformation change across different states.**

612

613

614 **Supplementary Information**

615 **Supplementary Figure 1**

616 **Supplementary Figure 2**

617 **Supplementary Figure 3**

618 **Supplementary Figure 4**

619 **Supplementary Movie 1**
